# Supplementary material
Source: PubMed Central journal article supplement (PMC7833277)
Supplement: mmc1.pdf [file mmc1.pdf]

## Appendix A. Supplementary Figures and Tables

Table A1. Descriptive Statistics

| <b>Panel A: City-Pair-daily Level Data</b> |                              |               |                            |               |
|--------------------------------------------|------------------------------|---------------|----------------------------|---------------|
| Sample Period                              | Jan 12, 2019 - Mar 12 , 2019 |               | Jan 1, 2020 - Feb 29, 2020 |               |
|                                            | Mean                         | S.D           | Mean                       | S.D           |
| CityPair Intensity                         | 0.011                        | 0.052         | 0.007                      | 0.044         |
| CityPair Flow Population                   | 997.044                      | 4,722.465     | 668.792                    | 3,970.201     |
| <b>Panel B: City-daily Level Data</b>      |                              |               |                            |               |
| Sample Period                              | Jan 12, 2019 - Mar 12 , 2019 |               | Jan 1, 2020 - Feb 29, 2020 |               |
|                                            | Mean                         | S.D           | Mean                       | S.D           |
| Outflow Intensity                          | 1.159                        | 1.568         | 0.717                      | 1.478         |
| Outflow Population                         | 105,287.503                  | 142,443.319   | 65,126.768                 | 134,310.998   |
| Inflow Intensity                           | 1.159                        | 1.608         | 0.717                      | 1.058         |
| Inflow Population                          | 105,261.037                  | 146,127.871   | 65,142.334                 | 96,153.964    |
| WithinCity Flow Intensity                  | 4.472                        | 0.818         | 3.592                      | 1.493         |
| WithinCity Flow Population                 | 1,492,950.639                | 1,346,858.619 | 1,188,276.693              | 1,223,892.324 |
| # of New Confirmed Cases                   | 0                            | 0             | 3.721                      | 105.176       |
| # of Total Confirmed Cases                 | 0                            | 0             | 78.364                     | 1,313.831     |
| # of New Deaths                            | 0                            | 0             | 0.129                      | 2.960         |
| # of Total Deaths                          | 0                            | 0             | 2.181                      | 50.409        |
| # of New Heals                             | 0                            | 0             | 1.792                      | 31.757        |
| # of Total Heals                           | 0                            | 0             | 17.211                     | 259.659       |

*Notes:* This table presents the descriptive statistics of the variables used in this study, with Panel A corresponding to the city-pair daily level variables and Panel B corresponding to the city daily level variables. The sample covers a period between Jan 12 and Mar 12 in 2019, and between Jan 1 and Feb 29 in 2020. The two periods in 2019 and 2020 cover the same lunar calendar.

Table A2. Various Levels of Prevention and Control Measures in Different Cities

| City                                             | Province     | Start Date | Cases as of<br>Feb 29, 2020 | City                                             | Province       | Start Date | Cases as of<br>Feb 29, 2020 |
|--------------------------------------------------|--------------|------------|-----------------------------|--------------------------------------------------|----------------|------------|-----------------------------|
| <b>Panel A. Complete Shutdown</b>                |              |            |                             | <b>Panel C. Checkpoints and Quarantine Zones</b> |                |            |                             |
| Wuhan                                            | Hubei        | 2020/1/23  | 49122                       | Jiujiang                                         | Jiangxi        | 2020/2/6   | 118                         |
| Huanggang                                        | Hubei        | 2020/1/23  | 2905                        | Yichun                                           | Jiangxi        | 2020/2/6   | 106                         |
| Ezhou                                            | Hubei        | 2020/1/23  | 1391                        | Zhuhai                                           | Guangdong      | 2020/2/6   | 98                          |
| Xiaogan                                          | Hubei        | 2020/1/24  | 3518                        | Suzhou                                           | Jiangsu        | 2020/2/6   | 87                          |
| Jingzhou                                         | Hubei        | 2020/1/24  | 1579                        | Ganzhou                                          | Jiangxi        | 2020/2/6   | 76                          |
| Suizhou                                          | Hubei        | 2020/1/24  | 1307                        | Maanshan                                         | Anhui          | 2020/2/6   | 38                          |
| Huangshi                                         | Hubei        | 2020/1/24  | 1014                        | Pingxiang                                        | Jiangxi        | 2020/2/6   | 33                          |
| Yichang                                          | Hubei        | 2020/1/24  | 931                         | Shenyang                                         | Liaoning       | 2020/2/6   | 28                          |
| Jingmen                                          | Hubei        | 2020/1/24  | 925                         | Jian                                             | Jiangxi        | 2020/2/6   | 22                          |
| Xianning                                         | Hubei        | 2020/1/24  | 836                         | Neijiang                                         | Sichuan        | 2020/2/6   | 22                          |
| Shiyan                                           | Hubei        | 2020/1/24  | 672                         | Dalian                                           | Liaoning       | 2020/2/6   | 19                          |
| Xiantao                                          | Hubei        | 2020/1/24  | 575                         | Yingtian                                         | Jiangxi        | 2020/2/6   | 18                          |
| Tianmen                                          | Hubei        | 2020/1/24  | 496                         | Jinzhou                                          | Liaoning       | 2020/2/6   | 12                          |
| Enshi                                            | Hubei        | 2020/1/24  | 252                         | Yibin                                            | Sichuan        | 2020/2/6   | 12                          |
| Qianjiang                                        | Hubei        | 2020/1/24  | 198                         | Huludao                                          | Liaoning       | 2020/2/6   | 12                          |
| Shennongjia                                      | Hubei        | 2020/1/24  | 11                          | Panjin                                           | Liaoning       | 2020/2/6   | 11                          |
| Xiangyang                                        | Hubei        | 2020/1/28  | 1175                        | Dandong                                          | Liaoning       | 2020/2/6   | 8                           |
| <b>Panel B. Partital Shutdown</b>                |              |            |                             | Yaan                                             | Sichuan        | 2020/2/6   | 7                           |
| Wenzhou                                          | Zhejiang     | 2020/2/2   | 504                         | Tieling                                          | Liaoning       | 2020/2/6   | 7                           |
| Haerbin                                          | Heilongjiang | 2020/2/4   | 198                         | Chaoyang                                         | Liaoning       | 2020/2/6   | 6                           |
| Hangzhou                                         | Zhejiang     | 2020/2/4   | 169                         | Anshun                                           | Guizhou        | 2020/2/6   | 4                           |
| Ningbo                                           | Zhejiang     | 2020/2/4   | 157                         | Liaoyang                                         | Liaoning       | 2020/2/6   | 3                           |
| Zhengzhou                                        | Henan        | 2020/2/4   | 157                         | Benxi                                            | Liaoning       | 2020/2/6   | 3                           |
| Zhumadian                                        | Henan        | 2020/2/4   | 139                         | Fushun                                           | Liaoning       | 2020/2/6   | 0                           |
| Fuzhou                                           | Fujian       | 2020/2/4   | 72                          | Shenzhen                                         | Guangdong      | 2020/2/7   | 417                         |
| <b>Panel C. Checkpoints and Quarantine Zones</b> |              |            |                             | Guangzhou                                        | Guangdong      | 2020/2/7   | 346                         |
| Chongqing                                        | Chongqing    | 2020/1/31  | 576                         | Hefei                                            | Anhui          | 2020/2/7   | 174                         |
| Yinchuan                                         | Ningxia      | 2020/1/31  | 35                          | Chengdu                                          | Sichuan        | 2020/2/7   | 143                         |
| Wuzhong                                          | Ningxia      | 2020/1/31  | 28                          | Tianjin                                          | Tianjin        | 2020/2/7   | 136                         |
| Fangchenggang                                    | Guangxi      | 2020/2/2   | 19                          | Tangshan                                         | Hebei          | 2020/2/7   | 58                          |
| Huaian                                           | Jiangsu      | 2020/2/3   | 66                          | Lianyungang                                      | Jiangsu        | 2020/2/7   | 48                          |
| Huaibei                                          | Anhui        | 2020/2/3   | 27                          | Lanzhou                                          | Gansu          | 2020/2/7   | 36                          |
| Xinyang                                          | Henan        | 2020/2/4   | 274                         | Guiyang                                          | Guizhou        | 2020/2/7   | 36                          |
| Nanjing                                          | Jiangsu      | 2020/2/4   | 93                          | Suining                                          | Sichuan        | 2020/2/7   | 17                          |
| Xuzhou                                           | Jiangsu      | 2020/2/4   | 79                          | Guangyuan                                        | Sichuan        | 2020/2/7   | 6                           |
| Changzhou                                        | Jiangsu      | 2020/2/4   | 51                          | Foshan                                           | Guangdong      | 2020/2/8   | 84                          |
| Linyi                                            | Shandong     | 2020/2/4   | 49                          | Qinhuangdao                                      | Hebei          | 2020/2/8   | 10                          |
| Nantong                                          | Jiangsu      | 2020/2/4   | 40                          | Ziyang                                           | Sichuan        | 2020/2/8   | 4                           |
| Zhenjiang                                        | Jiangsu      | 2020/2/4   | 12                          | Dongguan                                         | Guangdong      | 2020/2/9   | 99                          |
| Jingdezhen                                       | Jiangxi      | 2020/2/4   | 6                           | Huizhou                                          | Guangdong      | 2020/2/9   | 62                          |
| Jining                                           | Shandong     | 2020/2/5   | 258                         | Wuxi                                             | Jiangsu        | 2020/2/9   | 55                          |
| Nanchang                                         | Jiangxi      | 2020/2/5   | 231                         | Hanzhong                                         | Sanxi          | 2020/2/9   | 26                          |
| Qingdao                                          | Shandong     | 2020/2/5   | 60                          | Mianyang                                         | Sichuan        | 2020/2/9   | 22                          |
| Nanning                                          | Guangxi      | 2020/2/5   | 55                          | Deyang                                           | Sichuan        | 2020/2/9   | 18                          |
| Sanya                                            | Hainan       | 2020/2/5   | 54                          | Beijing                                          | Beijing        | 2020/2/10  | 413                         |
| Kunming                                          | Yunnan       | 2020/2/5   | 53                          | Shanghai                                         | Shanghai       | 2020/2/10  | 337                         |
| Cangzhou                                         | Hebei        | 2020/2/5   | 48                          | Baotou                                           | Inner Mongolia | 2020/2/12  | 11                          |
| Jinan                                            | Shandong     | 2020/2/5   | 47                          | Ereduosi                                         | Inner Mongolia | 2020/2/12  | 11                          |
| Haikou                                           | Hainan       | 2020/2/5   | 39                          | Xilinguole                                       | Inner Mongolia | 2020/2/12  | 9                           |
| Taizhou                                          | Jiangsu      | 2020/2/5   | 37                          | Chifeng                                          | Inner Mongolia | 2020/2/12  | 9                           |
| Taian                                            | Shandong     | 2020/2/5   | 35                          | Bayannaer                                        | Inner Mongolia | 2020/2/12  | 8                           |
| Shijiazhuang                                     | Hebei        | 2020/2/5   | 29                          | Hulunbeier                                       | Inner Mongolia | 2020/2/12  | 7                           |
| Zaozhuang                                        | Shandong     | 2020/2/5   | 24                          | Huhehaote                                        | Inner Mongolia | 2020/2/12  | 7                           |
| Yangzhou                                         | Jiangsu      | 2020/2/5   | 23                          | Tongliao                                         | Inner Mongolia | 2020/2/12  | 7                           |
| Rizhao                                           | Shandong     | 2020/2/5   | 16                          | Wulanchabu                                       | Inner Mongolia | 2020/2/12  | 3                           |
| Suqian                                           | Jiangsu      | 2020/2/5   | 13                          | Wuhai                                            | Inner Mongolia | 2020/2/12  | 2                           |
| Dongying                                         | Shandong     | 2020/2/5   | 0                           | Xingan                                           | Inner Mongolia | 2020/2/12  | 1                           |
| Xinyu                                            | Jiangxi      | 2020/2/6   | 130                         | Alashan                                          | Inner Mongolia | 2020/2/12  | 0                           |
| Shangrao                                         | Jiangxi      | 2020/2/6   | 123                         |                                                  |                |            |                             |

Notes: This table summarizes different levels of prevention and control measures across 115 cities. Panel A lists 17 cities with completed lockdown, which means all public transport and private vehicles are banned in the city, all residential buildings are locked down, and residents are not allowed to leave the city. 7 Cities in Panel B are under partial lockdown, the majority of the public transportation has been temporarily shut down, checkpoints have been set up to control the inflow population, and surveillance and tighter controls in each neighborhood. 91 Cities in Panel C set up checkpoints and quarantine zones, and public transport maintains normal operation.

Table A3. Summary Statistics of Cities with Different Level of Controls

|                                                                | Wuhan     | 7 Partial Lockdown Cities | Other Unlocked Cities |
|----------------------------------------------------------------|-----------|---------------------------|-----------------------|
| # of Total Cases as of Feb 2, 2020                             | 5,142     | 101                       | 13                    |
| Daily Average Population Inflow (2019 Sample Period)           | 466,682   | 294,799                   | 78,006                |
| Daily Average Population Outflow (2019 Sample Period)          | 420,900   | 282,995                   | 78,789                |
| Daily Average Within-City Population Flow (2019 Sample Period) | 3,270,509 | 3,305,080                 | 1,316,090             |
| Permanent Population (2019)                                    | 9,785,388 | 8,433,975                 | 3,524,548             |
| GDP (Trillion CNY) (2019)                                      | 1,153     | 811                       | 92                    |

*Notes:* This table provides summary statistics on the count of total confirmed cases as of February 2, 2020, and on daily average population inflow, outflow, and within-city flow between January 12 and March 12 in 2019, and on permanent population GDP as of December 2019, for cities with different level of controls.

Figure A1. Cities with Control Measures and the Confirmed COVID-19 Cases

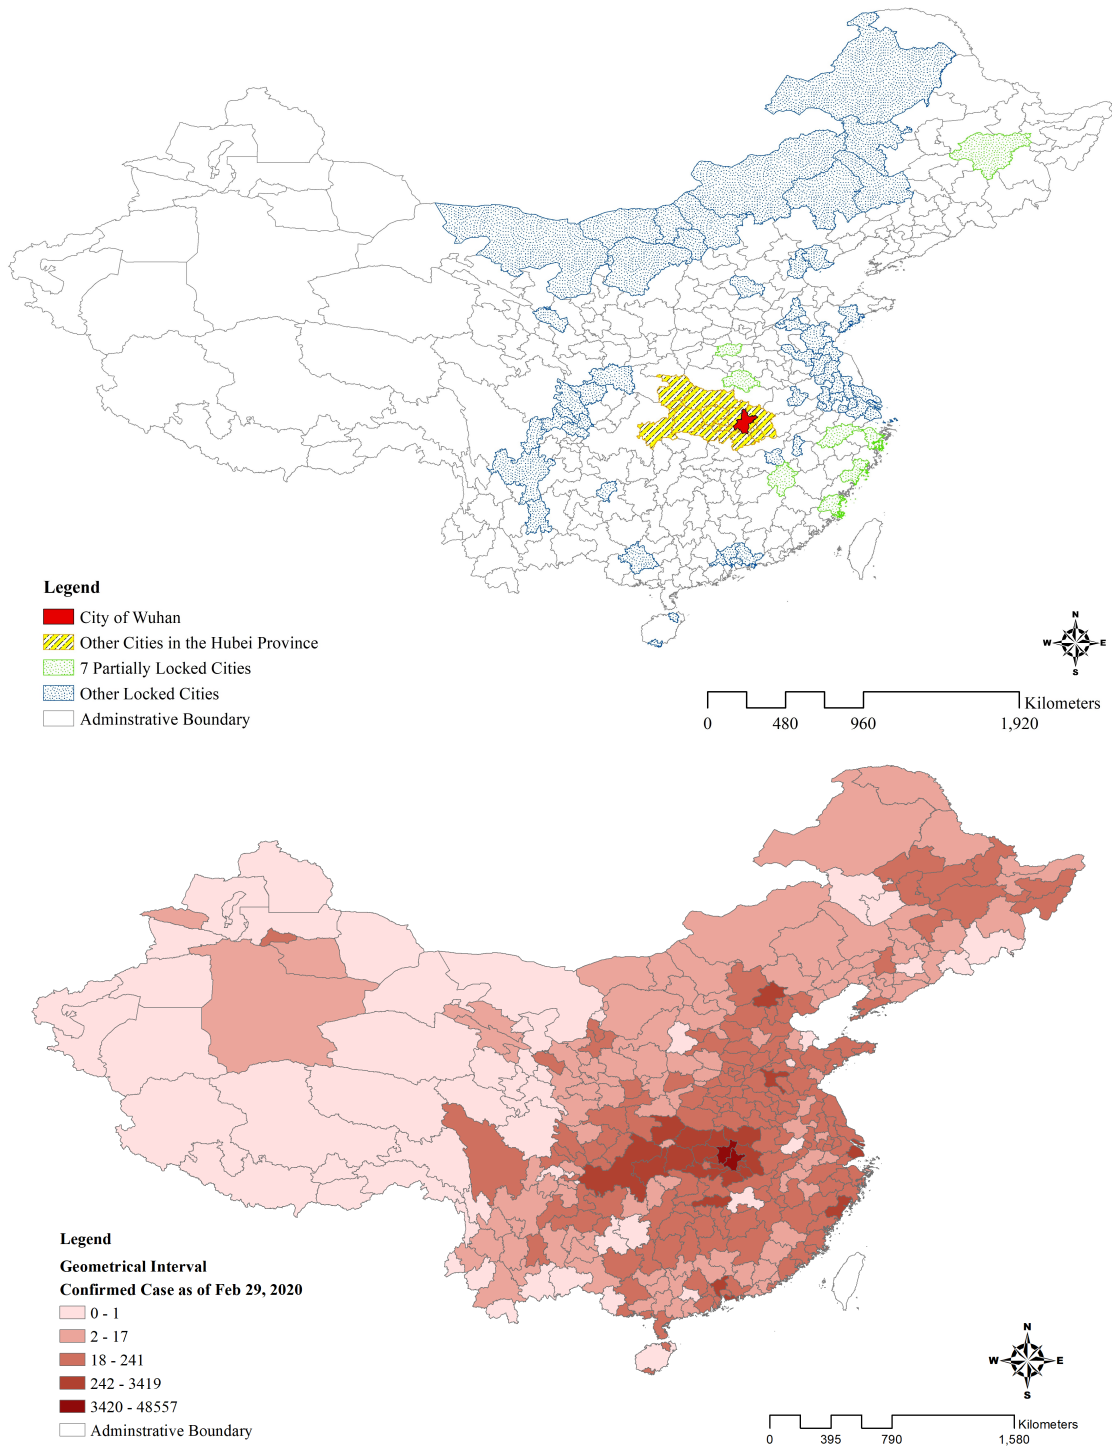

*Notes:* This figure presents the geographic distributions of cities with different levels of control measures and the number of Confirmed COVID-19 Cases as of Feb 29, 2020. The maps were plotted with ArcGIS 10.2 (ESRI).

Figure A2. Inter-city and Within-city Population Flows

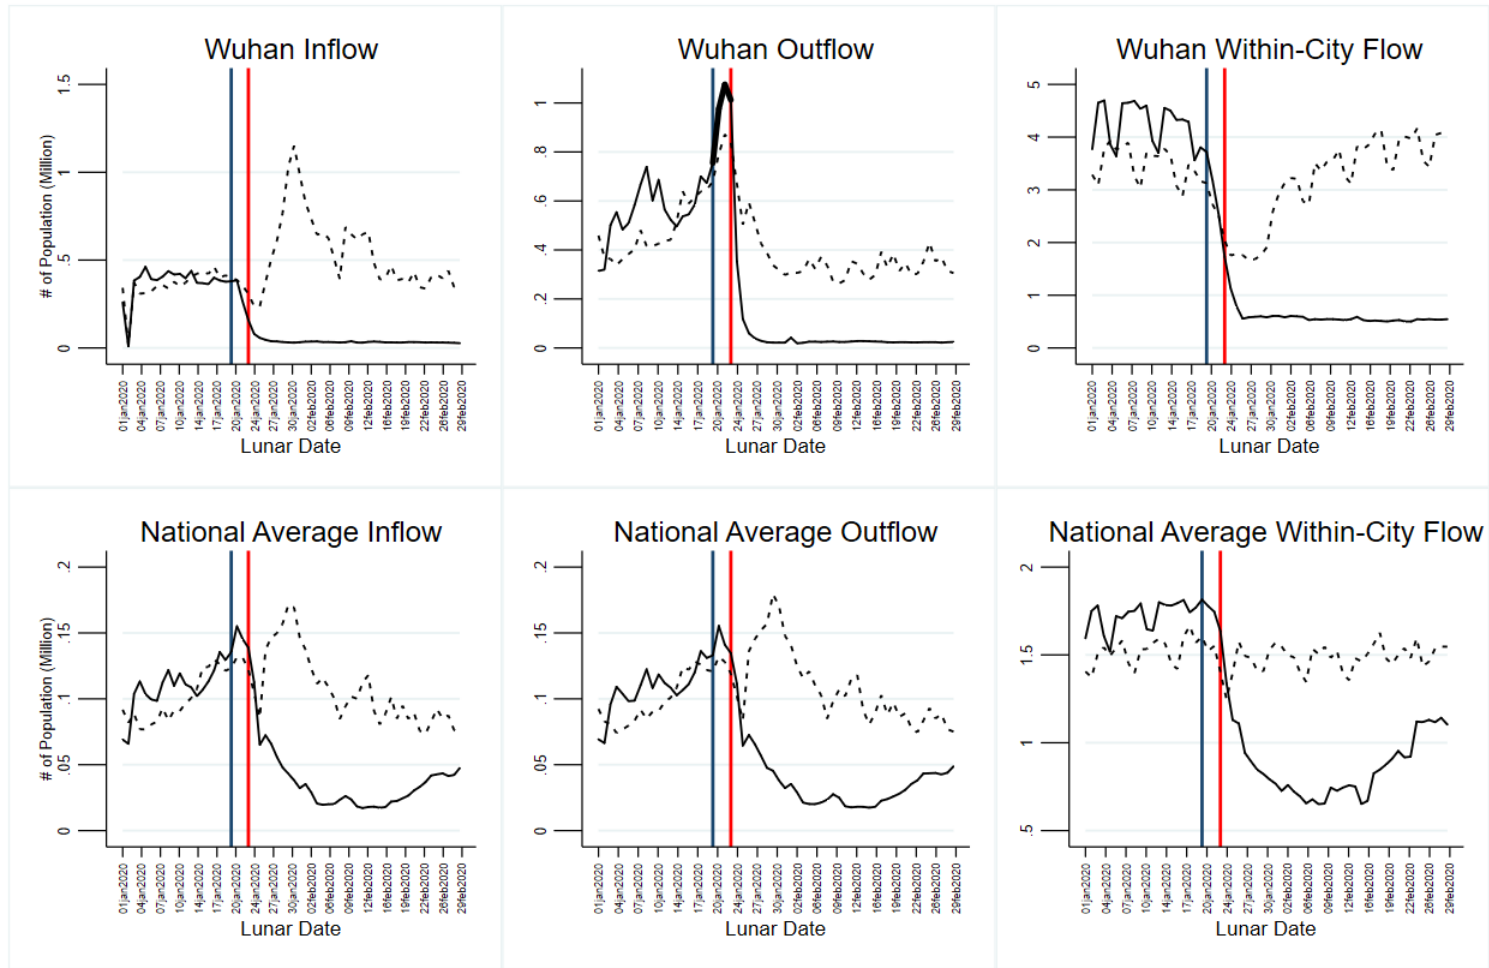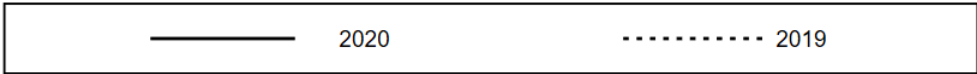

Notes: Top figures show the inflows into Wuhan, outflows from Wuhan and within-Wuhan flows, for year 2020 (in the solid line) and year 2019 (in the dashed line), matched by the lunar calendar; and the bottom shows the corresponding figures for the national city averages. The blue vertical line indicates the date of January 20, 2020 when the health ministry confirmed human-to-human transmission of COVID-19; and the red vertical line indicates the date of January 23, 2020 when Wuhan was locked down.

Figure A3. Daily Confirmed Cases and Cumulative Confirmed Cases

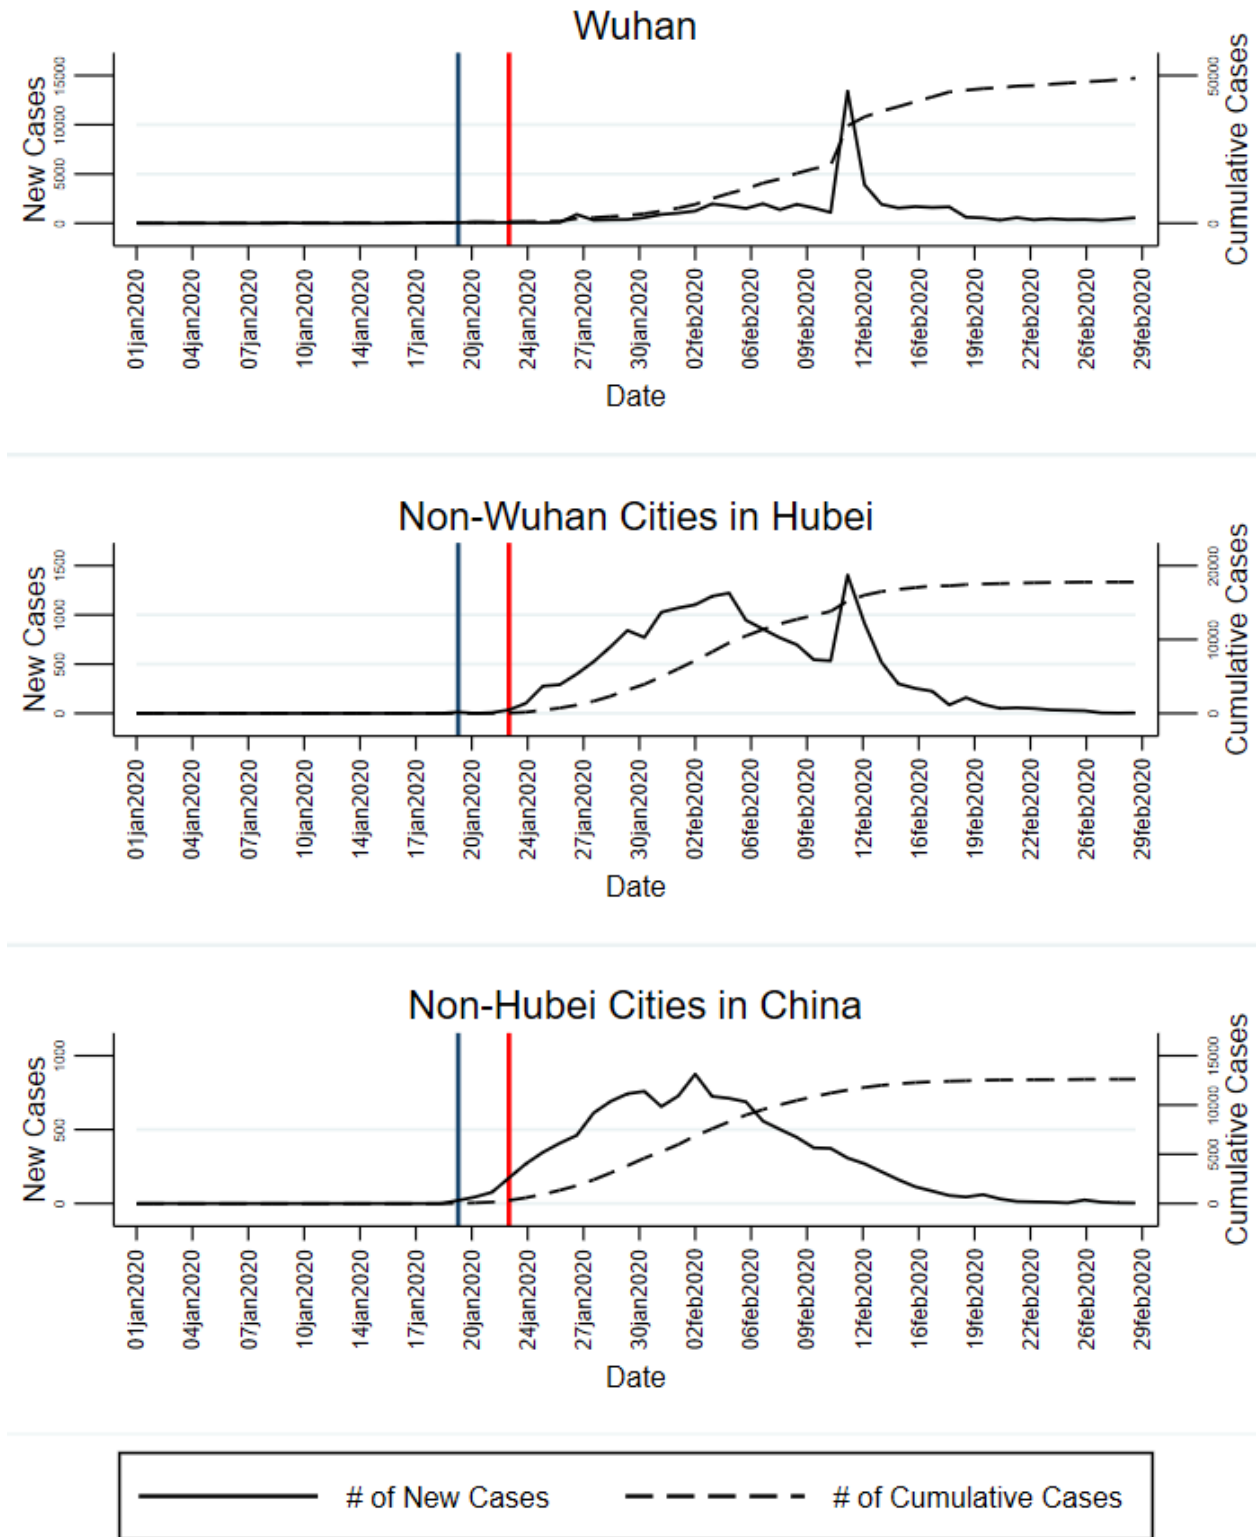

Notes: This figure shows the daily confirmed, dead, and healed cases in Wuhan, other cities in Hubei Province, and cities outside of Hubei Province.

Figure A4. Dynamic Impacts of Pre and Post Destination City Lockdown

Panel A: Inflows from Wuhan

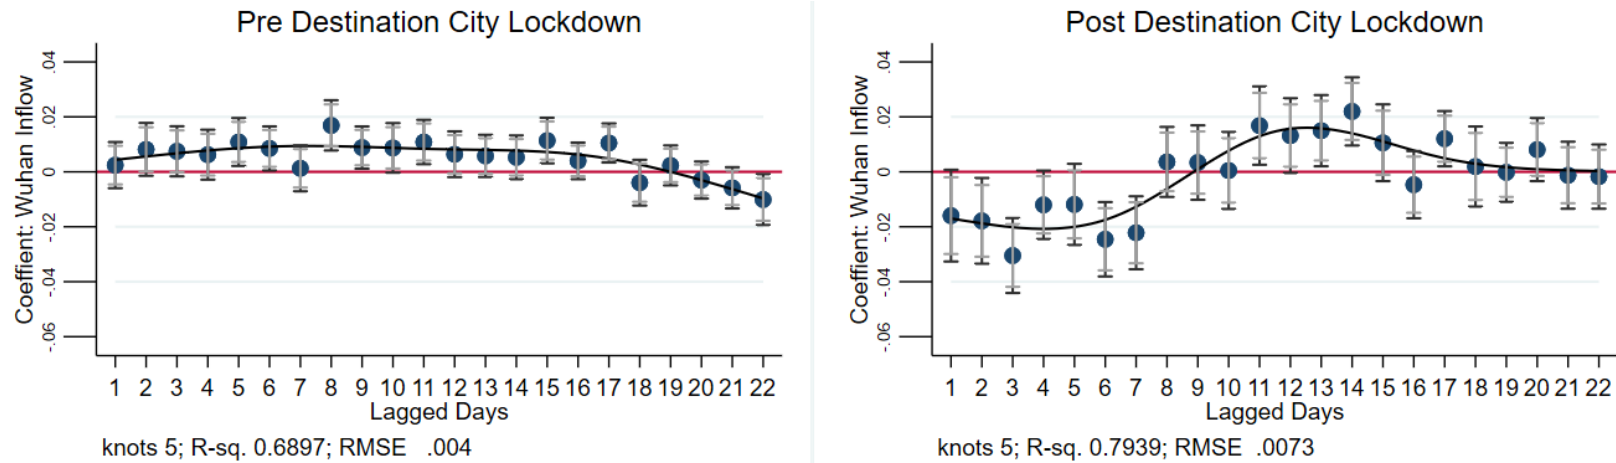

Panel B: Inflows from non-Wuhan Cities of Hubei

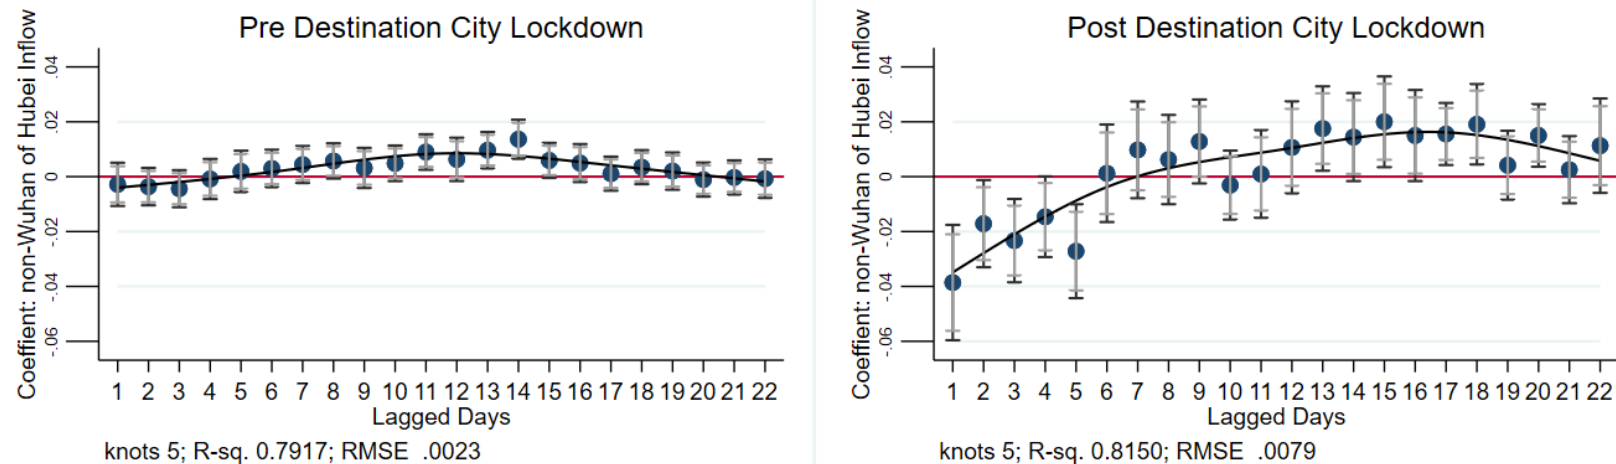

Notes: Panel A plots the dynamic lagged effects of past inflows from Wuhan pre (left figure) and post (right figure) destination cities' lockdown policy, if any. Panel B plots the dynamic lagged effects of past inflows from non-Wuhan Cities of Hubei pre (left figure) and post (right figure) destination cities' lockdown policy, if any. The coefficient estimates are obtained from estimating Equation (4). We add spline smoothing fit curves (in red) using the *rcspline* function and plot the 90% (the vertical gray whiskers) and 95% (the vertical black whiskers) confidence intervals.

Figure A5. Estimation on the “Actual” Number of Infected Cases in Wuhan and other Cities of Hubei

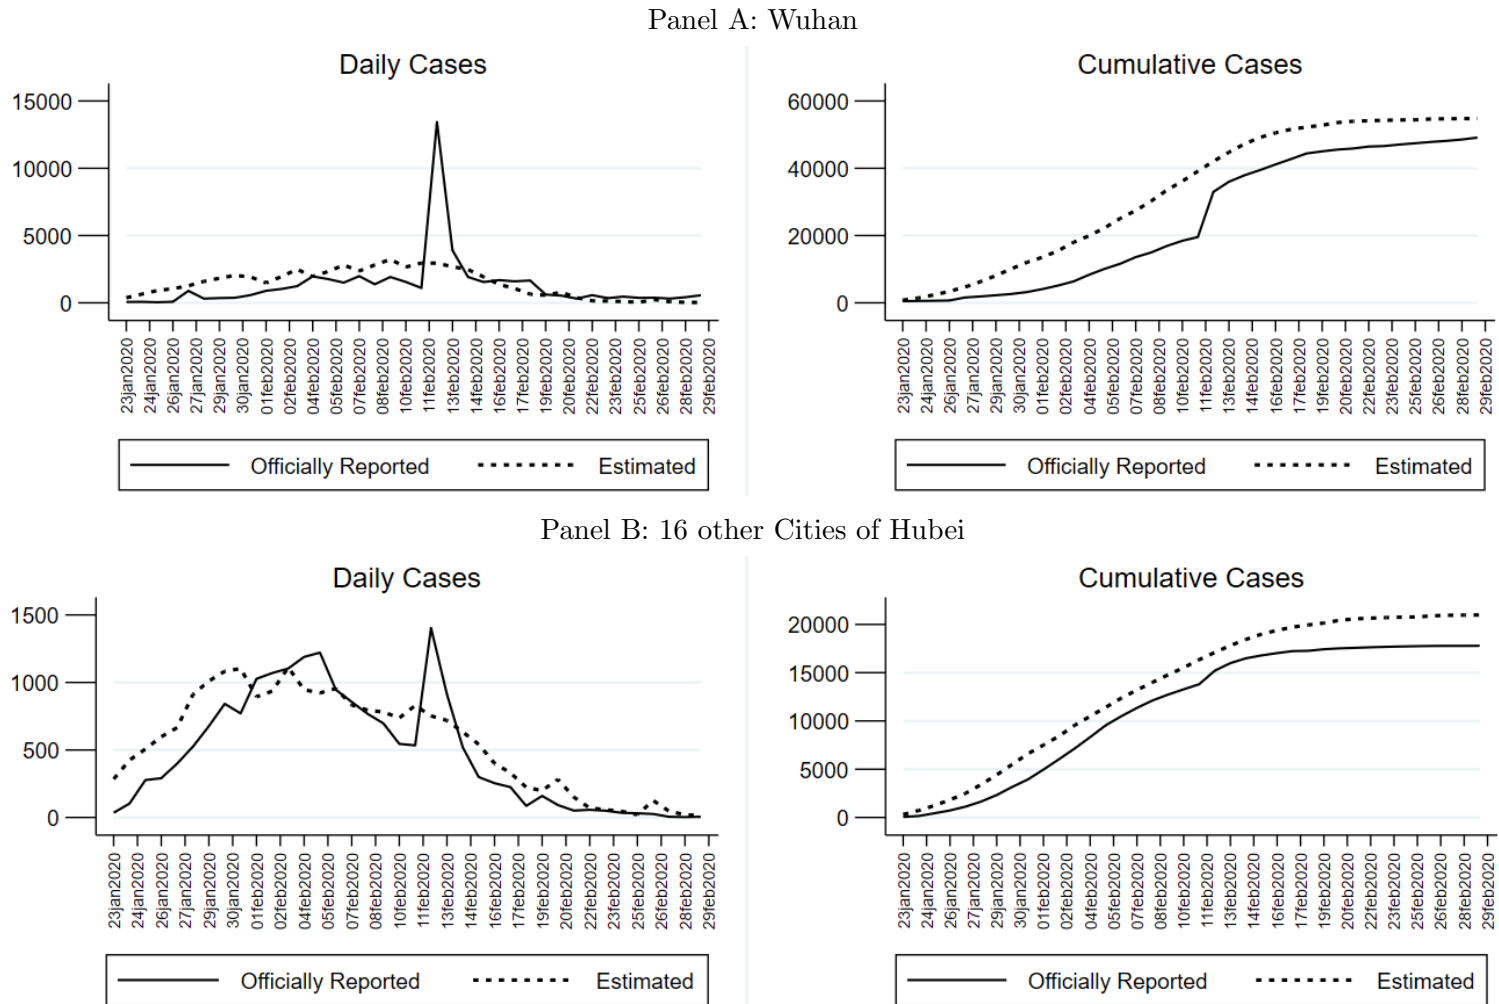

*Notes:* This figure compares the estimated COVID-19 cases (in the dotted curve) with the officially reported confirmed cases (in the solid curve) in Wuhan (top) and in 16 non-Wuhan cities in Hubei Province (bottom) from January 23 to February 29 in 2020. The left panel plots the estimated new COVID cases on each date  $t$  from 23 (January 23, 2020) to 60 (February 29, 2020). The right panel plots the estimated cumulative cases each day.



Figure A6: Daily Search Frequencies of COVID-19 Related Keywords

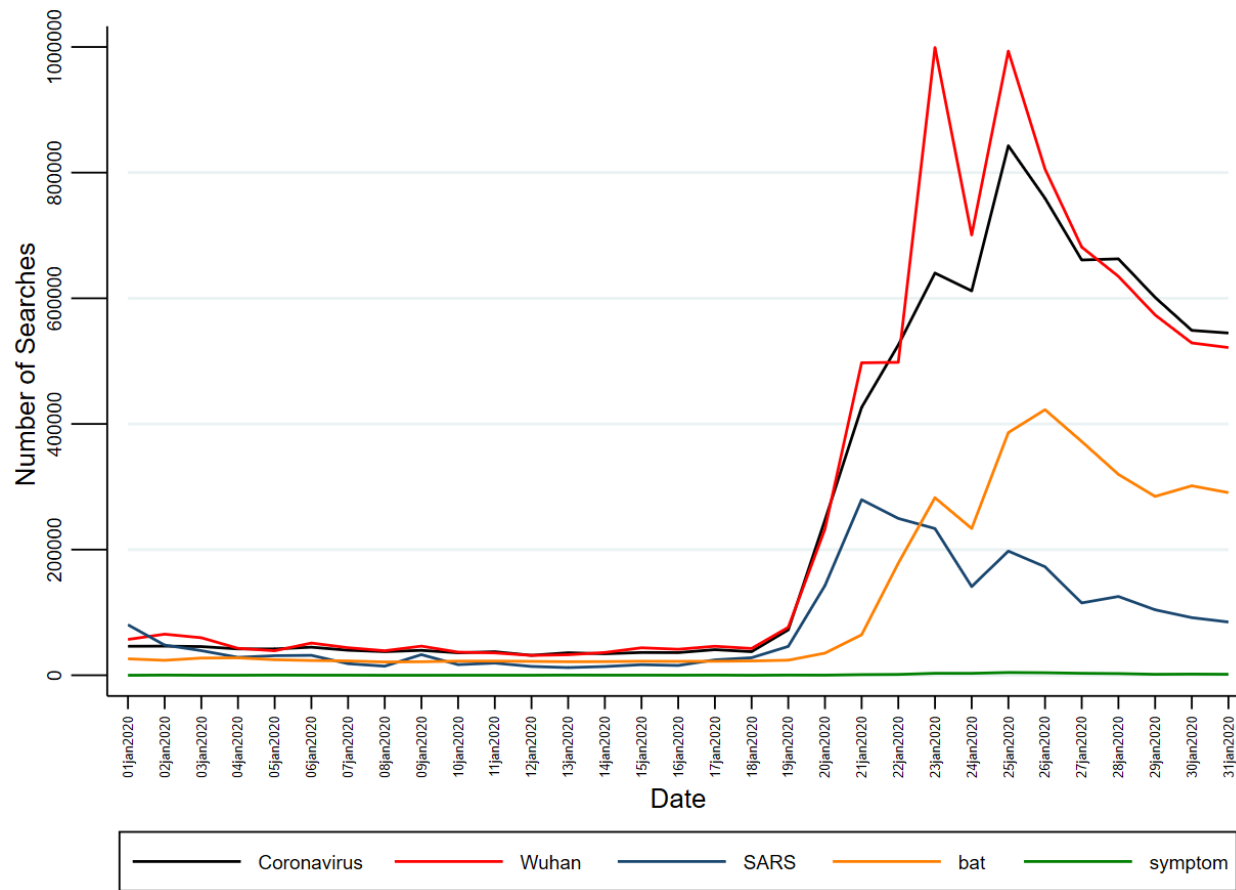

*Notes:* This figure graphs the daily search frequency of COVID-19 related keywords, including “Coronavirus”, “Wuhan”, “Bat”, “SARS”, and “symptom” (in Chinese). It shows a clear and abrupt spike in the search frequencies on January 20, the day of the public confirmation of human-to-human transmission of the Novel Coronavirus by Dr. Zhong Nanshan on Chinese national TV.

## Appendix B. The Conversion of Baidu Mobility Indices into Number of Population Movements

We obtain three migration intensity indicators (the daily *in-migration* index (IMI) of a city, the daily *out-migration* index (OMI) of a city, and the daily *within-city* migration index (WCMI)) from Baidu Migration for 364 Chinese cities. Baidu Migration<sup>16</sup> uses Baidu Maps Location Based Service (LBS) open platform and Baidu Tianyan to calculate and analyze the LBS data, and provides visual presentation to show the trajectory and characteristics of the population migration. Baidu has been the dominant search engine in China because all Google search sites have been banned in mainland China since 2010.

Specifically, Baidu Migration provides the following information: (1), the top 100 origination cities (OC) for the population moving *into* the city and the corresponding percentages of inflow population that originated from each of the top 100 OC; and (2), the top 100 destination cities (DC) for the population moving *out of* the city, together with the corresponding percentages of the outflow population that go into each of the top DC. In the data, the cumulative percentages of the inflow population from the top 100 origination cities, and the cumulative percentages of the outflow population into the top 100 destination cities, reach 97% per city on average, which ensures that the Baidu Migration data capture near complete inflows and outflows for each of the 364 cities in the data.

We convert the mobility index unit into the number of population movements by taking the daily inflow of people into Shanghai by airplanes, trains, buses and cars, the daily within-city trips in Shanghai by subways, buses and expressways (provided by NESSDC), and the corresponding inflow index and within-city mobility index in Shanghai (provided by Baidu). Based on the definition of inter-city mobility indices provided by Baidu, the inter-city indices are comparable both across cities and time. We first divide the actual number of inflow/outflow population by the inflow/outflow index in a day to obtain population number per unit of inter-city index. For instance, given that the actual inflow population of 302,6000 on February 6, 2020 into Shanghai corresponds to the inflow index of 3.72, the population number per unit inflow index is  $302,600/3.72=81344.08$  on February 6, 2020. Since the NESSDC provides the actual number of inflow population between February 6 and February 22, 2020, we can then calculate population per unit inflow index for each day of this period and obtain an average population per inflow index, which equals to 90,848. To convert the inter-city flow indices into the total inter-city population flows for all cities, we multiply the indices by 90,848.

To convert the within-city mobility index to actual population flows, we weight the index by the number of the city's base population called "*regular residents*" in 2019 (i.e., people who had stayed in the city for at least six months during the year). For instance, given that the actual within-city population flows of 4,339,451 on February 6, 2020 in Shanghai corresponds to the within-city mobility index of 1.6 and the base population in Shanghai in 2019 is 24,237,800, the per unit within-city index is  $(4,339,451/24,237,800)/1.6*24,237,800=2,712,156$ . Similarly, we calculate

---

<sup>16</sup>Source: <http://qianxi.baidu.com/>

the population per within-city mobility index for each day of this period to determine an average population per within-city flow index, which is 2,182,264. We then convert the within-city mobility indices into the number of within-city population flows for all cities by multiplying the indices by 2,182,264 and the ratio of a city's base population in 2019 over Shanghai's base population in 2019, 24,237,800. For instance, if the within-city mobility index in Wuhan on February 6, 2020 is 0.6 and Wuhan's base population in 2019 is 9,785,388, then the actual number of within-city population flows in Wuhan on February 6, 2020 is  $2,182,264 * 0.6 * (9,785,388 / 24,237,800) = 528,620$ .

## Appendix C. Estimating the “Actual” Number of Infection Cases in Wuhan and Other Cities in Hubei

Anecdotal evidence suggests the official statistics of COVID-19 cases in Wuhan may have been under-reported due to the shortages of testing equipment and other medical resources. With the estimated dynamic effects shown in Figure 1, which is estimated under the plausible assumption that the reported cases outside Hubei are reliable, we can estimate the “actual” number of infection cases in Wuhan and other cities in Hubei.

To estimate the “actual” number of infections in Wuhan using the estimates from Eq. (3), we technically need to impute a value for  $Inflow_{WH,WH,t-\kappa}$ , that is “inflows from Wuhan to Wuhan.” We proxy these inflows by the daily *within-Wuhan* population movement from January 1 to February 29, i.e., by  $WithinCityFlow_{WH,t-\kappa}$ . Similarly, to estimate the “actual” number of infection cases in other cities in Hubei, we need to replace the inflow from Wuhan to itself by the corresponding daily within-city- $j$  population movements.

However, we do not have the city fixed effects for cities in Hubei because they were not included in the estimation sample for Eq. (3). Therefore, we cannot directly predict the “actual” number of infections in Wuhan and other cities in Hubei using Eq. (6). Instead, we use the estimated  $\hat{\beta}_{1\kappa}$  coefficient as a measure of the *elasticity* of the new cases outside of Hubei at date  $t$  with respect to inflows from Wuhan  $\kappa$  days ago. We then calculate the percentage difference between the within-Wuhan population flow  $Inflow_{WH,WH,t-\kappa}$  and the average inflows from Wuhan to cities outside Hubei, i.e.,  $(\sum_{i=1}^{347} Inflow_{i,WH,t-\kappa})/347$ , together with the average new daily cases outside of Hubei at date  $t$  and  $\hat{\beta}_{1\kappa}$ , to impute what Wuhan new cases would have been at date  $t$ , *under the assumption that* the relationship dictating the within-Wuhan population movements and Wuhan’s “actual” new cases at date  $t$  is similar to that estimated for cities outside Hubei in Eq. (3). We follow the same method to estimate the “actual” number of new infections in 16 other cities of Hubei.

In Appendix Figure A5, we plot the estimated daily new cases according to the above-described method using the estimated Eq. (3), as well as the corresponding cumulative cases for Wuhan (Panel A) and 16 other cities of Hubei (Panel B) for the period of January 23 to February 29, 2020. We also plotted the corresponding daily and cumulative officially reported (i.e., documented) cases.

We find a persistent gap between the estimated and reported laboratory-confirmed cases in Wuhan before February 11, 2020, just before the announcement of a new Party Secretary for Hubei on February 12, 2020. The estimated “actual” number of infection cases is 2.81 times the reported cases during the first 20 days after the Wuhan lockdown, on average. In particular, we estimate that on January 23, 2020, the day of the Wuhan lockdown, 38.29% of our estimated infections in Wuhan were undocumented in the sense that the number of officially reported cases on that day was only 61.71% of our estimated infection cases. This undocumented-real gap widened over time, possibly due to the overwhelmed health care system, and peaked at 79.57% on January 26. The proportion of undocumented infections started to decline gradually, when more medical support and resources were mobilized across China to support Wuhan. As of February 29, we estimate that

there were 54,797 total COVID-19 infections in Wuhan, which is 11.55% higher than the official reported statistics for Wuhan - a total of 49,122 cases. The 11.55% discrepancy can be plausibly explained by the unaccounted for self-healing and death that might have occurred during the early periods of the outbreak between January 23 and early February. Thus, we are led to conclude that the almost all infection cases in Wuhan were able to be treated over time as the stress on the health system was relieved, and moreover, the official statistics were mostly accurate, as can be seen from the left figure on the daily new cases in Panel A in Figure A5.

In the bottom panel of Figure A5, we plot our estimated daily new confirmed cases and total infection case for 16 cities (other than Wuhan) in Hubei, together with the officially reported series. We find that in the 16 cities, infections were more seriously under-reported in the first week after the Wuhan lockdown when our estimated infected cases are 1.87 times the reported cases. Our estimate reveals a very high rate of undocumented infections on the first day of Wuhan lockdown: 81.02%. The gap narrowed gradually with more medical resources provided and more stringent control measures implemented in those cities. By the end of our study period on February 29, 2020, the estimated “actual” number of infections is 20,981 cases in 16 other cities in Hubei, which is 17.97% higher than the officially reported cumulative cases (17,785). The discrepancy between the estimated and officially reported cumulative cases could at least be partially attributed to the unaccounted for self-healing and death that might have occurred during the early periods of the outbreak.
